# Supplementary material
Source: PubMed Central journal article supplement (PMC1316164)
Supplement: cmaj_173_12_1473__1.pdf [file cmaj_173_12_1473__1.pdf]

## Appendix 1: Steps in the database search strategy\* used for the literature review

- 1.exp MyocardialInfarction/
- 2.(MI or AMI omyocardial infarct\$ or acute cardiac infarct\$ or heart infarct\$ or heart attack\$).mp.
- 3.1 or 2
- 4.exp Fibrinolytic Agents/
- 5.exp Fibrinolysis/
- 6.exp Thrombolytic Therapy/
- 7.fibrinoly\$.mp.
- 8.thromboly\$.mp
- 9.exp Plasminogn Activators/
10. plasminogen activator\$.mp.
11. (t-pa or tpa or tissue plasminogen activator).mp.
12. alteplase.mp.
13. streptokinase.mp.
14. (tenecteplase or TNK-tPA or TNK).mp.
15. (reteplase or r-pa).mp.
16. urokinase.mp.
17. anistreplase.mp.
18. or/4-17
19. exp Angioplasty/
20. (facilitat\$ adj2 angioplasty).tw.
21. (immediate\$ adj2 angioplasty).tw.
22. (early adj2 angioplasty).tw.
23. (adjunct\$ adj2 angioplasty).tw.
24. (combin\$ adj2 angioplasty).tw.
25. (facilitat\$ adj2 coronary angioplasty).tw.
26. (immediate\$ adj2 coronary angioplasty).tw.
27. (early adj2 coronary angioplasty).tw.
28. (adjunct\$ adj2 coronary angioplasty).tw.
29. (combin\$ adj2 coronary angioplasty).tw.
30. (facilitat\$ adj4 PCI).tw.
31. (immediate\$ adj4 PCI).tw.
32. (early adj4 PCI).tw.
33. (adjunct\$ adj4 PCI).tw.
34. (combin\$ adj4 PCI).tw.
35. (facilitat\$ adj4 PTCA).tw.
36. (immediate\$ adj4 PTCA).tw.
37. (early adj4 PTCA).tw.
38. (adjunct\$ adj4 PTCA).tw.
39. (combin\$ adj4 PTCA).tw.
40. (facilitat\$ adj2 percutaneous coronary intervention\$).tw.
41. (immediate\$ adj2 percutaneous coronary intervention\$).tw.
42. (early adj2 percutaneous coronary intervention\$).tw.
43. (adjunct\$ adj2 percutaneous coronary intervention\$).tw.
44. (combin\$ adj2 percutaneous coronary intervention\$).tw.
45. (facilitat\$ adj2 percutaneous transluminal angioplasty).tw.
46. (immediate\$ adj2 percutaneous transluminal angioplasty).tw.
47. (early adj2 percutaneous transluminal angioplasty).tw.
48. (adjunct\$ adj2 percutaneous transluminal angioplasty).tw.
49. (combin\$ adj2 percutaneous transluminal angioplasty).tw.
50. (immediate\$ adj2 percutaneous coronary angioplasty).tw.
51. (early adj2 percutaneous coronary angioplasty).tw.
52. or/20-51
53. 3 and 18 and 19 and 52
54. limit 53 to (human and yr=1985-2004)
55. remove duplicates from 54

\*This example was taken from the Ovid MEDLINE search for studies from 1966 through the second week of July, 2004.

Online data supplement to Cantor WJ, Brunet F, Ziegler CP, Kiss A, Morrison LJ. Immediate angioplasty after thrombolysis [review]. *CMAJ* 2005;173(12):1473-81, DOI: 10.1503/cmaj.045278.

**Appendix 2: Funnel plot of precision by effect size for this meta-analysis, illustrating mortality at 6–12 months**

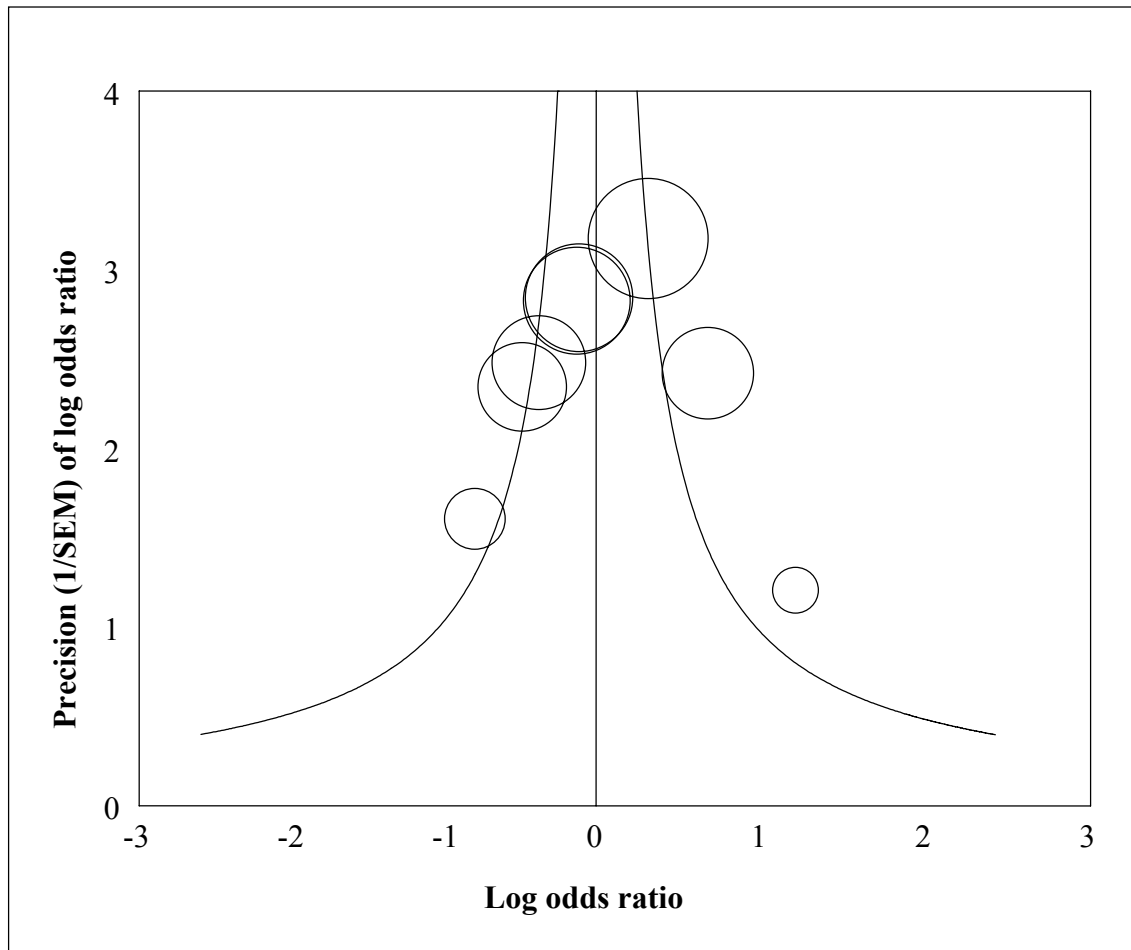

Note: 1/SEM = inverse of the standard error of the mean.

Online data supplement to Cantor WJ, Brunet F, Ziegler CP, Kiss A, Morrison LJ. Immediate angioplasty after thrombolysis [review]. *CM*. 2005;173(12):1473-81, DOI: 10.1503/cmaj.045278.

**Appendix 3: Funnel plot of precision by effect size for this meta-analysis, illustrating a composite of death and reinfarction at 6–12 months**

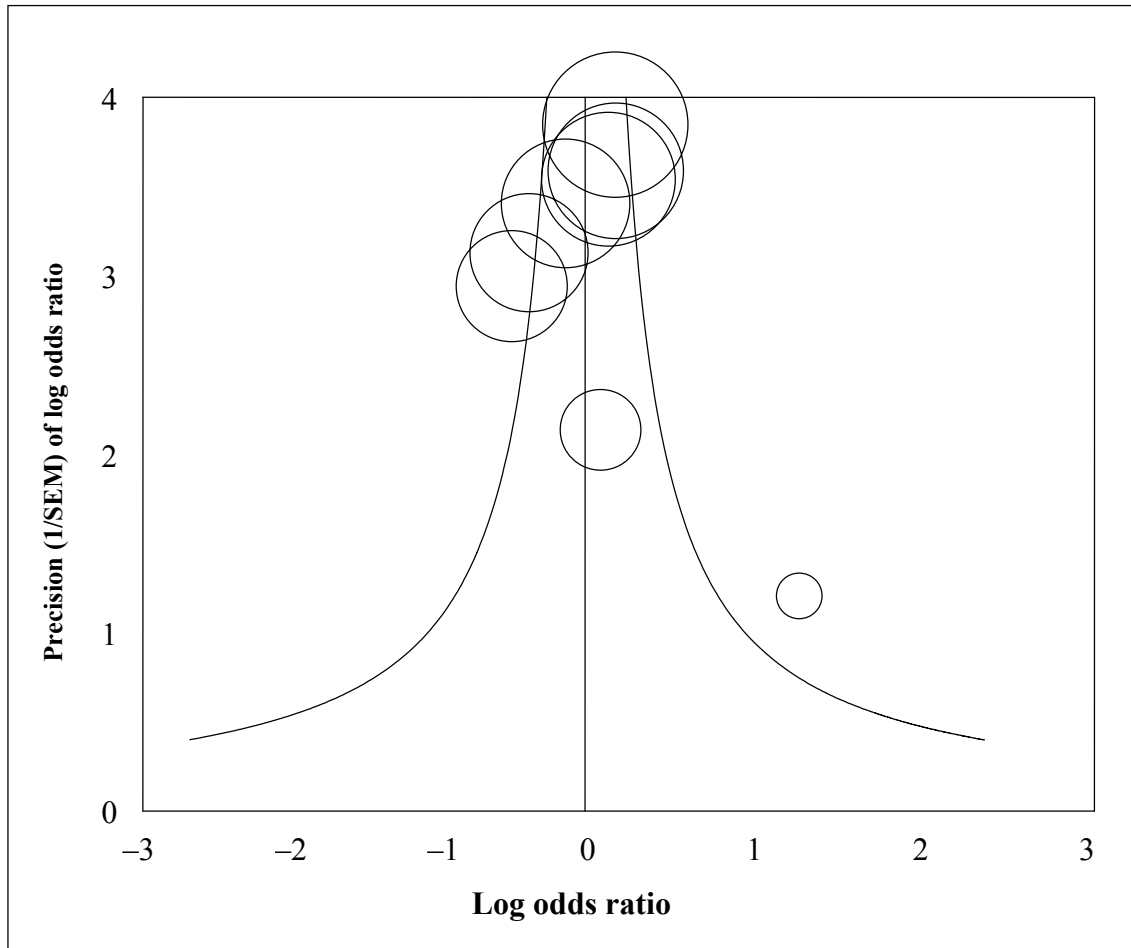

Note: 1/SEM = inverse of the standard error of the mean.

Online data supplement to Cantor WJ, Brunet F, Ziegler CP, Kiss A, Morrison LJ. Immediate angioplasty after thrombolysis [review]. *CMAJ* 2005;173(12):1473-81, DOI: 10.1503/cmaj.045278.
