# Supplementary material
Source: PubMed Central journal article supplement (PMC1316164)
Supplement: cmaj_173_12_1473_v2_1.pdf [file cmaj_173_12_1473_v2_1.pdf]

| Table 1: Studies that found an advantage for early percutaneous coronary intervention after thrombolysis versus delayed intervention |      |              |                                                                 |                                                                               |       |      |                                                                                                                                                   |                                                              |  |
|--------------------------------------------------------------------------------------------------------------------------------------|------|--------------|-----------------------------------------------------------------|-------------------------------------------------------------------------------|-------|------|---------------------------------------------------------------------------------------------------------------------------------------------------|--------------------------------------------------------------|--|
| Study                                                                                                                                | n    | Study design | Intervention                                                    | Comparison group                                                              | ILCOR |      | Clinical endpoints                                                                                                                                | Other endpoints                                              |  |
|                                                                                                                                      |      |              |                                                                 |                                                                               | Lo E  | D&M  |                                                                                                                                                   |                                                              |  |
| Califf et al <sup>19</sup><br><i>Circulation</i> 1991;83:1543<br>TAMI-5 trial                                                        | 575  | RCT          | Immediate Cath ± rescue PCI for failed thrombolysis             | Cath at 5–10 d after thrombolysis                                             | 1     | Good | Fewer adverse outcomes (33% v. 45%, $p = 0.004$ ); no significant difference in transfusion rates                                                 | Trend toward higher patency with immediate Cath              |  |
| Hochman et al <sup>35</sup><br><i>N Engl J Med</i> 1999;341:625<br>SHOCK trial                                                       | 302  | RCT          | Emergency PCI/CABG for cardiogenic shock                        | Conservative noninterventional strategy                                       | 1     | Good | Survival improved at 6 mo with emergency revascularization (OR 0.80, 95% CI 0.54–0.98)                                                            |                                                              |  |
| Fernandez-Aviles et al <sup>20</sup><br><i>Lancet</i> 2004;364:1045<br>GRACIA-1 trial                                                | 500  | RCT          | PCI (stent) within 24 h of thrombolysis (25% required transfer) | Conservative noninterventional strategy                                       | 1     | Good | Less revascularization (OR 0.30, 95% CI 0.15–0.62) and trend toward less death/MI at 1 yr (OR 0.59, 95% CI 0.33–1.05)                             |                                                              |  |
| Bednar et al <sup>18</sup><br><i>Can J Cardiol</i> 2003;19:1133<br>PRAGUE study                                                      | 300  | RCT          | Group B — thrombolysis during transfer for Cath, PCI (stent)    | Group A — thrombolysis without transfer<br>Group C — transfer for primary PCI | 2     | Good | No significant difference in overall mortality; lower cardiac mortality for early presenters (within 2 h): group A 18%, B 3%, C 8% ( $p < 0.05$ ) |                                                              |  |
| Topol et al <sup>22</sup><br><i>Circulation</i> 1987;75:420<br>TAMI-1 pilot study                                                    | 28   | RCT          | PCI 120 min after tPA                                           | Angiography at 120 min, no PCI                                                | 2     | Fair | Less recurrent ischemia and reinfarction (7% v. 53%, $p = 0.01$ )                                                                                 | Greater improvement in infarct-zone regional LV function     |  |
| Scheller et al <sup>21</sup> <i>J Am Coll Cardiol</i> 2003;42:634<br>SIAM III study                                                  | 197  | RCT          | PCI (stent) 6 h after reteplase                                 | PCI (stent) 2 wk after reteplase                                              | 2     | Fair | Lower rate of ischemic events (5% v. 28%, $p = 0.001$ )                                                                                           | Higher LVEF at 2 wk and 6 mo                                 |  |
| Ellis et al <sup>37</sup><br><i>Circulation</i> 1994;90:2280<br>RESCUE trial                                                         | 151  | RCT          | Rescue PCI after failed thrombolysis                            | Conservative noninterventional strategy                                       | 2     | Fair | Trend toward less death or severe CHF (6% v. 17%, $p = 0.05$ ) with rescue PCI                                                                    | Improvement with rescue PCI in exercise but not resting LVEF |  |
| Vermeer et al <sup>23</sup><br><i>Heart</i> 1999;82:426<br>LIMI trial                                                                | 224  | RCT          | tPA + transfer for immediate Cath, rescue PCI if needed         | tPA alone, or transfer for primary PCI                                        | 2     | Fair | No complications during transport<br>No significant differences in outcomes                                                                       |                                                              |  |
| Herrmann et al <sup>24</sup> <i>J Am Coll Cardiol</i> 2000;36:1489<br>SPEED trial                                                    | 323  | NRC          | PCI (stent) 90 min after reteplase, abciximab or both           | Conservative noninterventional strategy                                       | 3     | Fair | Less reinfarction (1.2% v. 4.9%, $p = 0.03$ ) and urgent revascularization (1.6% v. 9.3%, $p = 0.001$ )                                           |                                                              |  |
| Kurihara et al <sup>14</sup><br><i>Am Heart J</i> 2004;147:E14                                                                       | 39   | RCT          | Monteplase + PCI (stent)                                        | Primary PCI (stent)                                                           | 7     | Good | No significant differences in clinical outcomes, including LVEF                                                                                   | Higher rate of patency pre-PCI with monteplase               |  |
| Ross et al <sup>26</sup> <i>J Am Coll Cardiol</i> 1999;34:1954<br>PACT                                                               | 606  | RCT          | 50 mg tPA before immediate Cath/PCI                             | Placebo before immediate Cath/PCI                                             | 7     | Good | No significant difference in adverse outcomes or LV function                                                                                      | Improved IRA patency pre-PCI associated with tPA             |  |
| Schweiger et al <sup>25</sup> <i>J Am Coll Cardiol</i> 2001;88:831<br>TIMI 10B + TIMI 14                                             | 1938 | NRC          | PCI (stent) 90 min after thrombolysis                           | Conservative noninterventional strategy                                       | 7     | Fair | Lower rate of death/MI in multivariate model (OR 0.46, 95% CI 0.24–0.87)                                                                          |                                                              |  |
| Berger et al <sup>36</sup><br><i>Circulation</i> 1997;96:122<br>GUSTO-I                                                              | 2200 | NRC          | Early angiography, PCI/CABG for cardiogenic shock               | No early angiography for cardiogenic shock                                    | 7     | Fair | Independently associated with lower 30-d mortality (OR 0.43, 95% CI 0.34–0.54)                                                                    |                                                              |  |

Note: Superscript numbers correspond to the reference list in the main article (*CMAJ* 2005;173(12):1473-81, DOI: 10.1503/cmaj.045278), a review of immediate angioplasty after thrombolysis, which was printed with a less detailed version of this table. The article is also available online ([www.cmaj.ca/cgi/content/full/173/12/1473](http://www.cmaj.ca/cgi/content/full/173/12/1473)).

CABG = coronary artery bypass graft surgery, Cath = cardiac catheterization, CHF = congestive heart failure, CI = confidence interval, D&M = design and methods, GRACIA = GRupo de Análisis de la Cardiopatía Isquémica Aguda, GUSTO = Global Utilization of Streptokinase and Tissue plasminogen activator for Occluded coronary arteries, ILCOR = International Liaison Committee on Resuscitation, IRA = infarct-related artery, LIMI = Limburg Intervention/Myocardial Infarction, LoE = level of evidence, LV = left-ventricular, LVEF = left-ventricular ejection fraction, MI = myocardial infarction, NRC = nonrandomized comparison, OR = odds ratio, PACT = Plasminogen-activator Angioplasty Compatibility Trial, PCI = percutaneous coronary intervention, PRAGUE = PRimary Angioplasty after transport of patients from General community hospitals to cath Units with/without Emergency thrombolysis infusion, RCT = randomized controlled trial, RESCUE = Randomized Evaluation of Salvage angioplasty with Combined Utilization of Endpoints, SHOCK = Should We Emergently Revascularize Occluded Coronaries for Cardiogenic Shock, SIAM III = Southwest German Interventional study in Acute Myocardial infarction), SPEED = Strategies for Patency Enhancement in the Emergency Department, TAMI = Thrombolysis and Angioplasty in Myocardial Infarction, TIMI = Thrombolysis in Myocardial Infarction, tPA = tissue plasminogen activator.

**Table 2:** Studies that did not find an advantage for early percutaneous coronary intervention after thrombolysis v. delayed intervention

| Study                                                                                      | <i>n</i> | Study design        | Intervention                                                     | Comparison group                                                                 | ILCOR |           | Clinical endpoints                                                                                                                     | Other endpoints                                         |
|--------------------------------------------------------------------------------------------|----------|---------------------|------------------------------------------------------------------|----------------------------------------------------------------------------------|-------|-----------|----------------------------------------------------------------------------------------------------------------------------------------|---------------------------------------------------------|
|                                                                                            |          |                     |                                                                  |                                                                                  | Lo E  | D&M       |                                                                                                                                        |                                                         |
| TIMI Research Group <sup>28</sup> <i>JAMA</i> 1988;260:2849<br>TIMI 2A                     | 389      | RCT                 | Immediate PCI after tPA                                          | Cath or PCI at 18–48 h after tPA                                                 | 1     | Excellent | Increased transfusion and CABG (16% v. 8%; <i>p</i> = 0.01)                                                                            | No difference in LVEF                                   |
| Rogers et al <sup>6</sup> <i>Circulation</i> 1990;81:1457<br>TIMI 2A                       | 586      | RCT                 | Immediate PCI after tPA                                          | PCI at 18–48 h after tPA, or ischemia-guided PCI                                 | 1     | Excellent | No improvement in mortality<br>Increased rates of transfusion, CABG                                                                    | No difference in LVEF                                   |
| Simoons et al <sup>27</sup> <i>Lancet</i> 1988;1:197<br>ECSG rTPA trial                    | 367      | RCT                 | Immediate PCI after tPA                                          | Conservative noninterventional strategy                                          | 1     | Excellent | Trend toward higher mortality at 14 d (7% v. 3%; <i>p</i> = 0.08)                                                                      | No difference in infarct size or LVEF                   |
| Michels and Yusuf <sup>33</sup> <i>Circulation</i> 1995;91:476                             | 2243     | Meta-analysis       | Immediate PCI after thrombolysis                                 | Delayed PCI or no PCI after thrombolysis                                         | 1     | Excellent | No difference in death/reinfarction at 6 wk and 1 yr (OR 1.38, 95% CI 0.81–2.34)                                                       |                                                         |
| Topol et al <sup>29</sup> <i>N Engl J Med</i> 1987;317:581<br>TAMI-1 trial                 | 197      | RCT                 | Transfer for Cath 90 min after tPA, immediate PCI                | Transfer for Cath 90 min after tPA, elective PCI at 7–10 d                       | 1     | Good      | No difference in death, reocclusion                                                                                                    | No difference in regional LV wall motion                |
| Jovell et al <sup>32</sup> <i>Online J Curr Clin Trials</i> 1993; doc no 67, PMID: 8306009 | 5882     | Meta-analysis       | Early PCI after thrombolysis                                     | Conservative noninterventional strategy                                          | 1     | Good      | No difference in rates of mortality or reinfarction                                                                                    |                                                         |
| Topol <sup>34</sup> <i>Ann Intern Med</i> 1988;109:970                                     | 1142     | Syst OV of 3 trials | Immediate PCI after thrombolysis                                 | See Topol <sup>29</sup> , Simmoons <sup>27</sup> and TIMI Research <sup>28</sup> | 1     | Good      | No improvement in mortality<br>Increased rates of transfusion, CABG                                                                    | No improvement in LVEF                                  |
| Arnold et al <sup>7</sup> <i>J Am Coll Cardiol</i> 1991;17:11<br>ECSG rTPA trial           | 291      | RCT                 | Immediate PCI after tPA                                          | Conservative noninterventional strategy                                          | 2     | Good      |                                                                                                                                        | No difference in regional LV wall motion                |
| Arnold et al <sup>8</sup> <i>Circulation</i> 1992;86:111<br>ECSG rTPA trial                | 367      | RCT                 | Immediate PCI after tPA                                          | Conservative noninterventional strategy                                          | 2     | Good      | Trend toward increased mortality at 1 yr (9% v. 5%; <i>p</i> = 0.16)                                                                   |                                                         |
| De Bono <sup>4</sup> <i>J Am Coll Cardiol</i> 1988;12(Suppl A):20A<br>ECSG rTPA trial      | 367      | RCT                 | Immediate PCI after tPA                                          | Conservative noninterventional strategy                                          | 2     | Good      | Trend toward increased mortality at 3 mo                                                                                               | No difference in LVEF, infarct size or coronary patency |
| Widimsky et al <sup>30</sup> <i>Eur Heart J</i> 2000;21:823<br>PRAGUE study                | 300      | RCT                 | Group B: thrombolysis during transfer for Cath, PCI (stent)      | Group A: thrombolysis without transfer<br>Group C: transfer for primary PCI      | 2     | Good      | Rates of death, reinfarction and stroke similar to those in group A, higher than those in group C                                      |                                                         |
| Erbel et al <sup>5</sup> <i>J Am Coll Cardiol</i> 1989;14:276                              | 206      | RCT                 | PCI after IV + subcutaneous streptokinase                        | Conservative noninterventional strategy                                          | 3     | Fair      | No difference in mortality at 3 yr                                                                                                     | No improvement in LV function                           |
| Ellis et al <sup>9</sup> <i>Coron Artery Dis</i> 1994;5:611<br>TAMI-1 analysis             | 108      | RCT                 | Immediate PCI after thrombolysis with TIMI 2 flow                | Conservative noninterventional strategy                                          | 7     | Fair      | No difference in rates of death or congestive heart failure                                                                            | Slightly better LVEF improvement with early PCI         |
| O'Neill et al <sup>31</sup> <i>Circulation</i> 1992;86:1710                                | 122      | RCT                 | Streptokinase, then immediate PCI                                | Primary PCI                                                                      | 7     | Fair      | Higher rates of transfusion, emergency CABG (10% v. 1.6%; <i>p</i> = 0.03)                                                             | No difference in LVEF or patency                        |
| Sutton et al <sup>38</sup> <i>J Am Coll Cardiol</i> 2004;44:287<br>MERLIN study            | 307      | RCT                 | Rescue PCI after failed thrombolysis                             | Conservative noninterventional strategy                                          | 2     | Good      | Higher rates of transfusion (11% v. 1%; <i>p</i> < 0.001) and stroke (5% v. 1%; <i>p</i> = 0.03)<br>No difference in mortality at 30 d | No difference in regional LV wall motion at 30 d        |
| Kastrati et al <sup>40</sup> <i>JAMA</i> 2004;291:947<br>BRAVE trial                       | 253      | RCT                 | Half-dose reteplase + abciximab, then transfer for immediate PCI | Abciximab, then transfer for immediate PCI                                       | 7     | Good      | No differences in death, reinfarction or stroke rates; trend toward increased bleeding with reteplase (6% v. 2%; <i>p</i> = 0.16)      | No difference in SPECT infarct size at 5–10 d           |

Note: Superscript numbers correspond to the reference list in the main article (*CMAJ* 2005;173(12):1473-81, DOI: 10.1503/cmaj.045278), a review of immediate angioplasty after thrombolysis, which was printed with a less detailed version of this table. The article is also available online ([www.cmaj.ca/cgi/content/full/173/12/1473](http://www.cmaj.ca/cgi/content/full/173/12/1473)).

BRAVE = Bavarian Reperfusion Alternatives Evaluation, CABG = coronary artery bypass graft surgery, Cath = cardiac catheterization, CI = confidence interval, D&M = design and methods, ESCG rTPA = European Cooperative Study Group for Recombinant Tissue-Type Plasminogen Activator, ILCOR = International Liaison Committee on Resuscitation, IV = Intravenous, LoE = level of evidence, LV = left-ventricular, LVEF = left-ventricular ejection fraction, MERLIN = Middlesbrough Early Revascularisation for the Limitation of Infarction, OR = odds ratio, PCI = percutaneous coronary intervention, PRAGUE = PRimary Angioplasty after transport of patients from General community hospitals to cath Units with/without Emergency thrombolysis infusion, RCT = randomized controlled trial, SPECT = single-photon emission computed tomography, Syst OV = systematic overview, TAMI = Thrombolysis and Angioplasty in Myocardial Infarction, TIMI = Thrombolysis in Myocardial Infarction, tPA = tissue plasminogen activator.
