# Supplementary material
Source: PubMed Central journal article supplement (PMC1316164)
Supplement: cmaj_173_12_1473_v3_1.pdf [file cmaj_173_12_1473_v3_1.pdf]

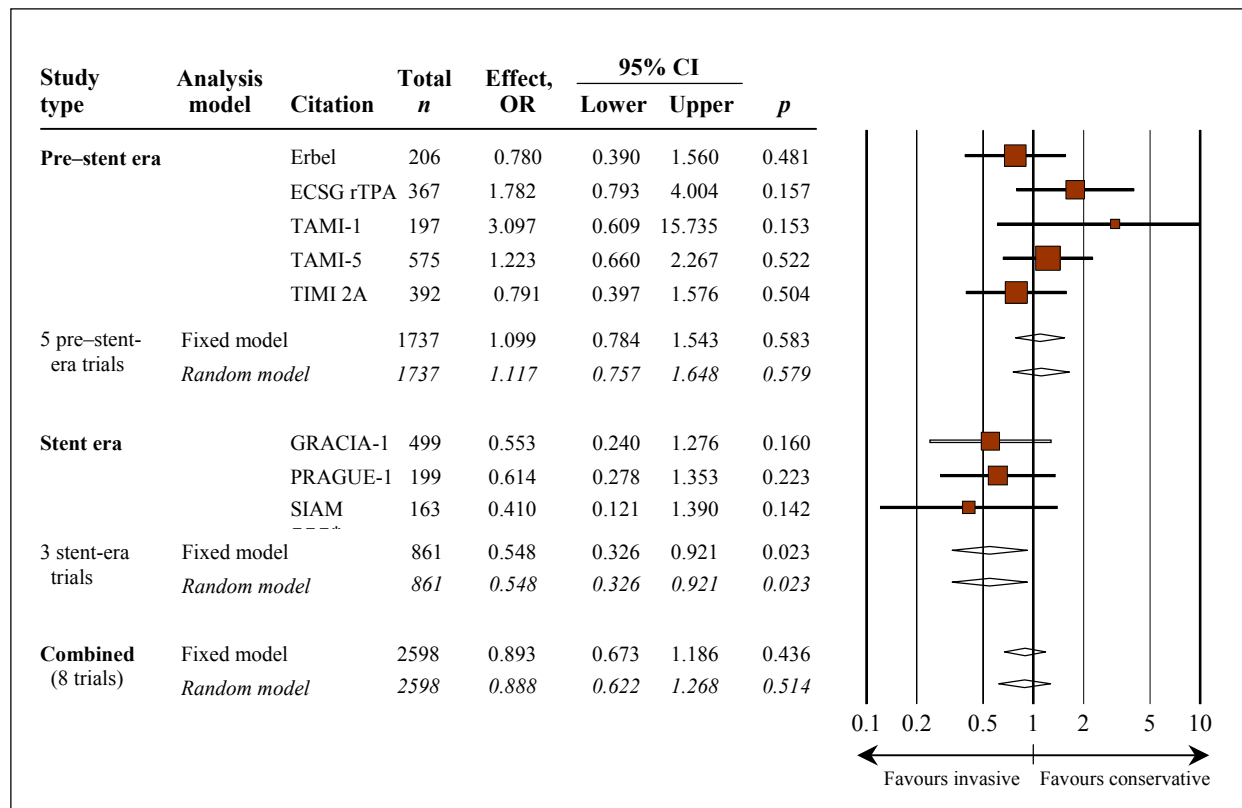

**Fig. 2:** Forest plot of odds ratios (ORs) for death within 12 months.\*

\*Within 6 months, in the SIAM III trial. CI = confidence interval.

ECSG rTPA = European Cooperative Study Group for Recombinant Tissue-Type Plasminogen Activator

TAMI = Thrombolysis and Angioplasty in Myocardial Infarction

TIMI = Thrombolysis in Myocardial Infarction

GRACIA = GRupo de Análisis de la Cardiopatía Isquémica Aguda

PRAGUE = PRimary Angioplasty after transport of patients from General community hospitals to cath Units with/without Emergency thrombolysis infusion

SIAM III = Southwest German Interventional study in Acute Myocardial infarction

Data supplement to Cantor WJ, Brunet F, Ziegler CP, Kiss A, Morrison LJ. Immediate angioplasty after thrombolysis [review]. *CMAJ* 2005;173(12):1473-81. DOI: 10.1503/cmaj.045278.

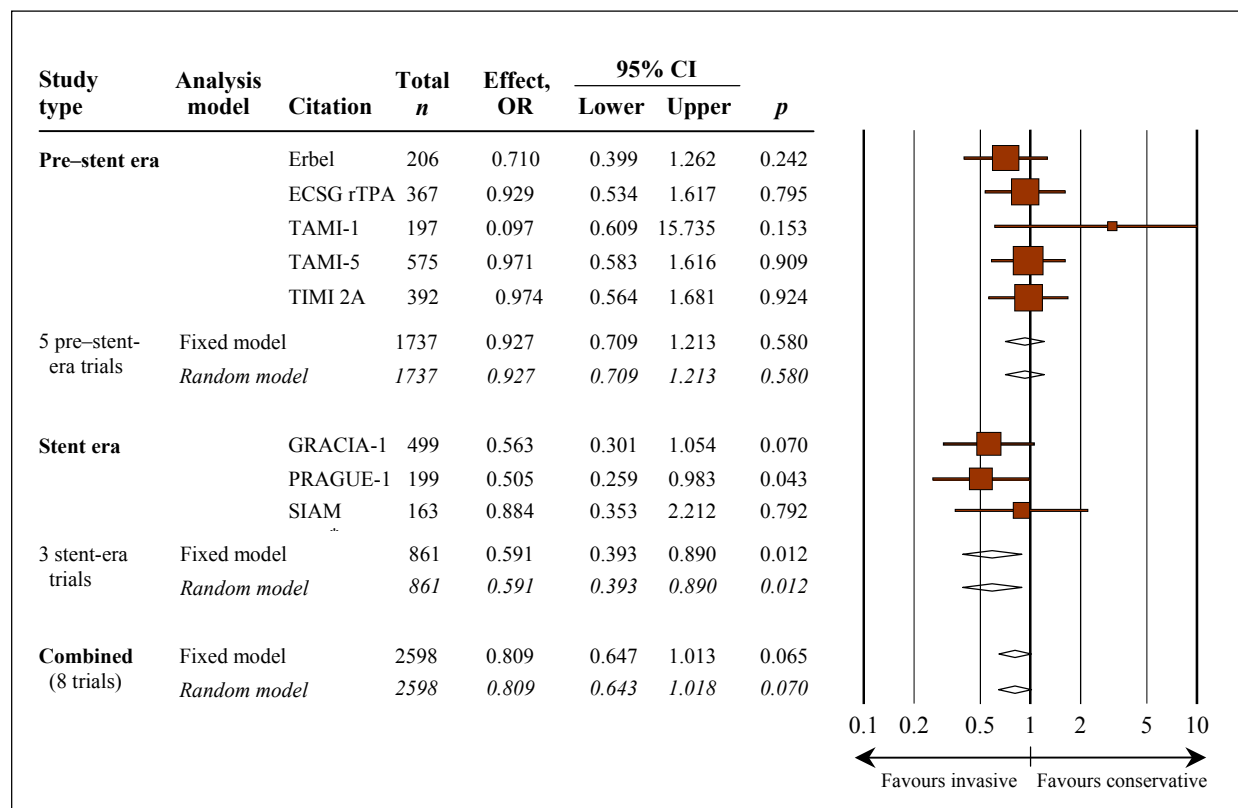

**Fig. 3:** Forest plot of odds ratios (ORs) for combined death or reinfarction within 12 months.\*

\*Within 6 months, in the SIAM III trial. CI = confidence interval.

ECSG rTPA = European Cooperative Study Group for Recombinant Tissue-Type Plasminogen Activator

TAMI = Thrombolysis and Angioplasty in Myocardial Infarction

TIMI = Thrombolysis in Myocardial Infarction

GRACIA = GRupo de Análisis de la Cardiopatía Isquémica Aguda

PRAGUE = PRimary Angioplasty after transport of patients from General community hospitals to cath

Units with/without Emergency thrombolysis infusion

SIAM III = Southwest German Interventional study in Acute Myocardial infarction

Data supplement to Cantor WJ, Brunet F, Ziegler CP, Kiss A, Morrison LJ. Immediate angioplasty after thrombolysis [review]. *CMAJ* 2005;173(12):1473-81. DOI: 10.1503/cmaj.045278.
